# Supplementary material for: Notch and mTOR Signaling Pathways Promote Human Gastric Cancer Cell Proliferation
Source: PubMed Central journal article supplement — Neoplasia. 2019 May 24;21(7):702–12. doi: 10.1016/j.neo.2019.05.002 (PMC6536707; doi:10.1016/j.neo.2019.05.002), 2019-05-24
Supplement: mmc1.pdf [file mmc1.pdf]

# Notch and mTOR Signaling Pathways Promote Human Gastric Cancer Cell Proliferation

Elise S. Hibdon<sup>a</sup>, Nataliya Razumilava<sup>b</sup>, Theresa M. Keeley<sup>a</sup>, Gabriela Wong<sup>a</sup>, Sumeet Solanki<sup>a</sup>, Yatrik M. Shah<sup>a,b</sup> and Linda C. Samuelson<sup>a,b,\*</sup>

Departments of <sup>a</sup>Molecular and Integrative Physiology and <sup>b</sup>Internal Medicine, University of Michigan

## SUPPLEMENTARY MATERIAL

### Index:

**Supplementary Table 1.** Patient information for human stomach tissue analysis.

**Supplementary Table 2.** List of antibodies used for immunostaining.

**Supplementary Table 3.** List of antibodies used for Western blot analysis.

**Supplementary Table 4.** List of RT-qPCR primers.

**Supplementary Figure 1.** Association of Notch pathway activation with molecular subtypes of human gastric cancer.

**Supplementary Figure 2.** Histology of non-cancer control tissues.

**Supplementary Figure 3.** Gastric cancer growth response to Notch inhibition.

**Supplementary Table 1.** Patient information for human stomach tissue samples used in current study.

| Patient | Age | Gender | Disease Pathology                                 | Sample | Tissue Type    | Tissue Use                |
|---------|-----|--------|---------------------------------------------------|--------|----------------|---------------------------|
| 1       | 42  | Male   | Moderately differentiated adenocarcinoma          | H12    | Gastric cancer | RNA, histology            |
|         |     |        |                                                   | H13    | Non-cancer     | RNA, histology            |
| 2       | 68  | Female | Adenocarcinoma, poorly cohesive type              | H37    | Non-cancer     | Histology                 |
|         |     |        |                                                   | H38    | Gastric cancer | Histology                 |
| 3       | 54  | Male   | Invasive adenocarcinoma, tubular type             | H39    | Non-cancer     | RNA, histology            |
|         |     |        |                                                   | H40    | Gastric cancer | RNA, histology            |
| 4       | 80+ | Female | Invasive poorly differentiated adenocarcinoma     | H41    | Non-cancer     | RNA, histology            |
|         |     |        |                                                   | H42    | Gastric cancer | RNA, histology            |
| 5       | 68  | Male   | Invasive moderately differentiated adenocarcinoma | H46    | Non-cancer     | RNA, histology, organoids |
|         |     |        |                                                   | H47    | Gastric cancer | RNA, histology, organoids |

**Supplementary Table 2.** List of antibodies used for immunostaining.

| <b>Antibody</b>       | <b>Host Species</b> | <b>Dilution</b> | <b>Source</b>         |
|-----------------------|---------------------|-----------------|-----------------------|
| Cleaved Notch1 (NICD) | Rabbit polyclonal   | 1:50            | Cell Signaling #4147S |
| HES1                  | Rabbit polyclonal   | 1:100           | Abcam #ab108937       |
| pS6                   | Rabbit monoclonal   | 1:300           | Cell Signaling #2215S |

**Supplementary Table 3.** List of antibodies used for western blot analysis.

| <b>Antibody</b> | <b>Host Species</b> | <b>Dilution</b> | <b>Source</b>         |
|-----------------|---------------------|-----------------|-----------------------|
| pS6             | Rabbit monoclonal   | 1:1000          | Cell Signaling #2215S |
| S6              | Mouse monoclonal    | 1:1000          | Cell Signaling #2317S |
| pAKT            | Rabbit polyclonal   | 1:1000          | Cell Signaling #9271S |
| AKT             | Mouse monoclonal    | 1:1000          | Cell Signaling #2920S |
| P4EBP1          | Rabbit monoclonal   | 1:1000          | Cell Signaling #2855S |
| 4EBP1           | Rabbit monoclonal   | 1:1000          | Cell Signaling #9644  |
| Actin           | Mouse               | 1:5000          | Proteintech #60008-1  |

**Supplementary Table 4.** List of RT-qPCR primers.

| Gene          | Forward (5'-3')        | Reverse (5'-3')          | Amplicon Size (bp) | Reference |
|---------------|------------------------|--------------------------|--------------------|-----------|
| <i>NOTCH1</i> | GACAGCCTCAACGGGTACAA   | CACACGTAGCCACTGGTCAT     | 137                | 1         |
| <i>NOTCH2</i> | CAACCGCCAGTGTGTTCAAG   | GAGCCATGCTTACGCTTTTCG    | 240                | 1         |
| <i>NOTCH3</i> | TCTTGCTGCTGGTCATTCTC   | TGCCTCATCCTCTTCAGTTG     | 485                | 1         |
| <i>NOTCH4</i> | TGAGGTGAATCCAGACAAC    | ATACAGTCATCCAGGTTCTC     | 261                | 1         |
| <i>DLL1</i>   | GATTCTCCTGATGACCTCGCA  | TCCGTAGTAGTGTTTCGTCACA   | 168                |           |
| <i>DLL3</i>   | CACTCCCGGATGCACTCAAC   | GATTCCAATCTACGGACGAGC    | 78                 |           |
| <i>DLL4</i>   | CTGCGAGAAGAAAGTGGACAGG | ACAGTCGCTGACGTGGAGTTCA   | 139                | 2         |
| <i>JAG1</i>   | GGGGCAACACCTTCAACCTC   | CCAGGCGAAACTGAAAGGC      | 77                 |           |
| <i>JAG2</i>   | TGCAAAAACCTGATTGGCGG   | CACACACTGGTACCCGTTCA     | 144                |           |
| <i>GAPDH</i>  | GAGTCCACTGGCGTCTTCACC  | GAGGCATTGCTGATGATCTTGAGG | 164                | 1         |
| <i>ACTB</i>   | CATCGAGCACGGCATCGTCA   | TAGCACAGCCTGGATAGCAAC    | 211                | 1         |

<sup>1</sup>Gifford GB, Demitrack ES, Keeley TM, et al. Notch1 and Notch2 receptors regulate mouse and human gastric antral epithelial cell homeostasis. *Gut* 2017;66:1001-1011.

<sup>2</sup>Weidenbusch M, Rodler S, Song S et al. Gene expression profiling of the Notch-AhR-IL22 axis at homeostasis and in response to tissue injury. *Biosci Rep* 2017;37:1-14.

**Supplementary Figure 1.** Association of Notch pathway activation with molecular subtypes of human gastric cancer. Normalized RNAseq data from the 4 subtypes of gastric adenocarcinoma in The Cancer Genome Atlas (TCGA) database were examined for upregulated expression of Notch receptors (NOTCH1 and NOTCH3) and ligands (DLL1, DLL4, JAG1 and JAG2). This analysis included 35 normal stomach (white circles) compared to gastric adenocarcinomas (black circles), including: (A-C) 210 chromosomal instability (CIN), (D-F) 76 microsatellite instability (MSI), (G-I) 30 Epstein-Barr virus positive (EBV) and (J-L) 70 genomically stable (GS) subtypes. Data are presented as mean  $\pm$  SEM. \*P<0.05, \*\*P<0.01, \*\*\*P<0.001, \*\*\*\*P<0.0001 vs. normal.

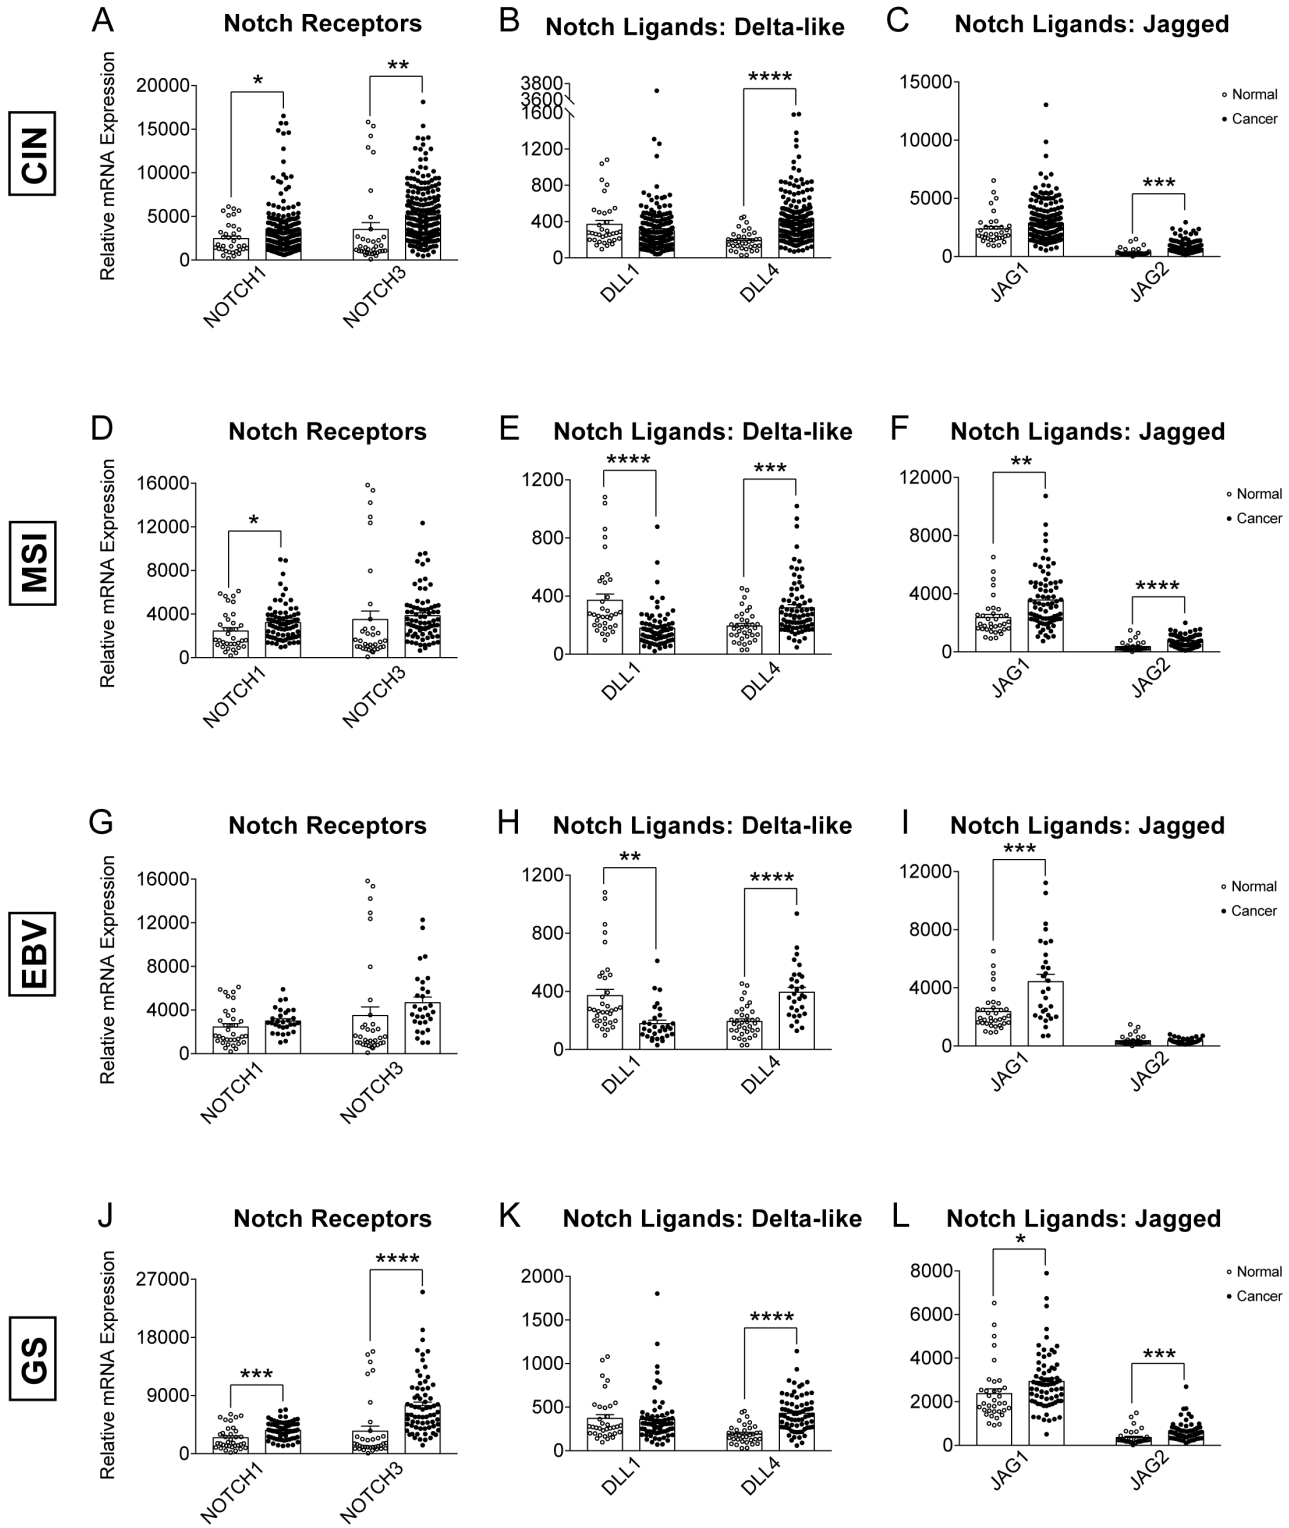

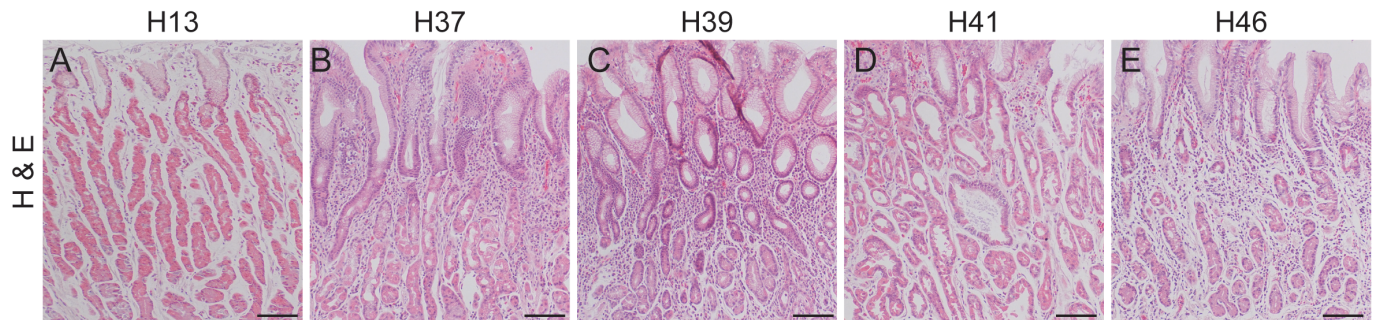

**Supplementary Figure 2.** Histology of non-cancer control tissues. Histological analysis of patient-matched non-cancer tissues to the 5 primary gastric adenocarcinoma samples used in the study assessed by H&E staining. Scale bars: 100  $\mu$ m.

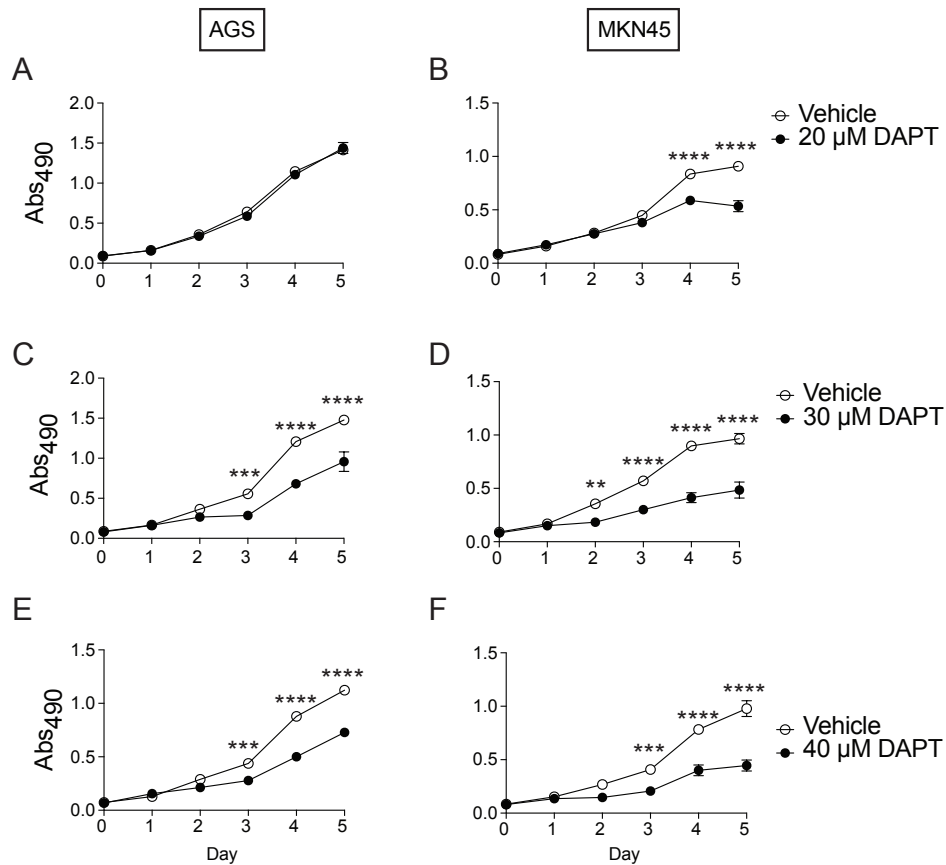

**Supplementary Figure 3.** Gastric cancer growth response to Notch inhibition. Gastric cancer cell lines AGS (A,C,E) and MKN45 (B,D,F) were treated with 20, 30 or 40  $\mu$ M of the Notch inhibitor DAPT or vehicle (Veh) daily, as marked. Cell growth was measured using a colorimetric assay kit. Veh, open circles; DAPT, filled circles. N-4 technical replicates for each sample. Data are presented as mean  $\pm$  SEM. \*\*P<0.01, \*\*\*P<0.001, \*\*\*\*P<0.0001 vs. vehicle by 2-way ANOVA.
